# Supplementary material
Source: Springer Nature journal article supplement (https://www.springermedizin.de/resource/supplementary/12879_2004_156_MOESM1_ESM.pdf/9448458)

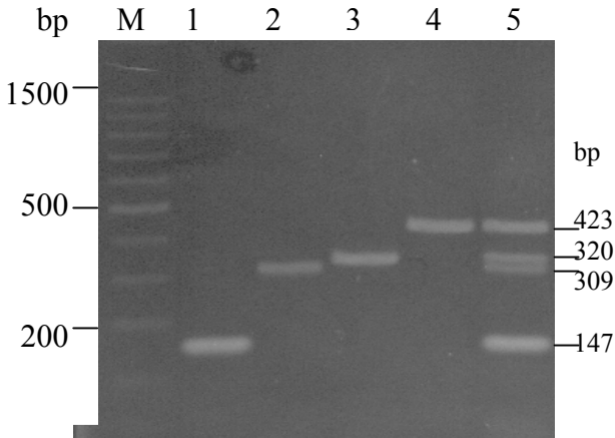

Supplement: MOESM1 [file 9448458]
